# Supplementary material for: Delayed induction of type I and III interferons mediates nasal epithelial cell permissiveness to SARS-CoV-2
Source: bioRxiv or medRxiv preprint supplement (doi:10.1101/2021.02.17.431591), 2021-09-09
Supplement: Supplementary file [file media-1.pdf]

1 **Delayed induction of type I and III interferons mediates nasal epithelial cell permissiveness to**  
2 **SARS-CoV-2**

3 Catherine F Hatton<sup>1a</sup>, Rachel A Botting<sup>2a</sup>, Maria Emilia Dueñas<sup>2a</sup>, Iram J Haq<sup>1,3a</sup>, Bernard Verdon<sup>2a</sup>,  
4 Benjamin J Thompson<sup>1</sup>, Jarmila Stremenova Spegarova<sup>1</sup>, Florian Gothe<sup>1,4</sup>, Emily Stephenson<sup>2</sup>, Aaron I  
5 Gardner<sup>1</sup>, Sandra Murphy<sup>2</sup>, Jonathan Scott<sup>1</sup>, James P Garnett<sup>1</sup>, Sean Carrie<sup>5</sup>, Jason Powell<sup>1</sup>, C M Anjam  
6 Khan<sup>2</sup>, Lei Huang<sup>1</sup>, Rafiqul Hussain<sup>6</sup>, Jonathan Coxhead<sup>6</sup>, Tracey Davey<sup>7</sup>, A John Simpson<sup>1</sup>, Muzlifah  
7 Haniffa<sup>2,8,9,10</sup>, Sophie Hambleton<sup>1,11</sup>, Malcolm Brodrie<sup>1,3b</sup>, Chris Ward<sup>1b</sup>, Matthias Trost<sup>2b</sup>, Gary  
8 Reynolds<sup>2b</sup>, Christopher J A Duncan<sup>1,12 b\*</sup>

9

10 **Supplementary Materials**

11

12 **Contents**

13 Supplementary Figures S1-10

14 Supplementary Tables S1-6

15 Supplementary Methods

16 Note supplementary datasets S1-5 (csv files) are not included in this file

17

18

19

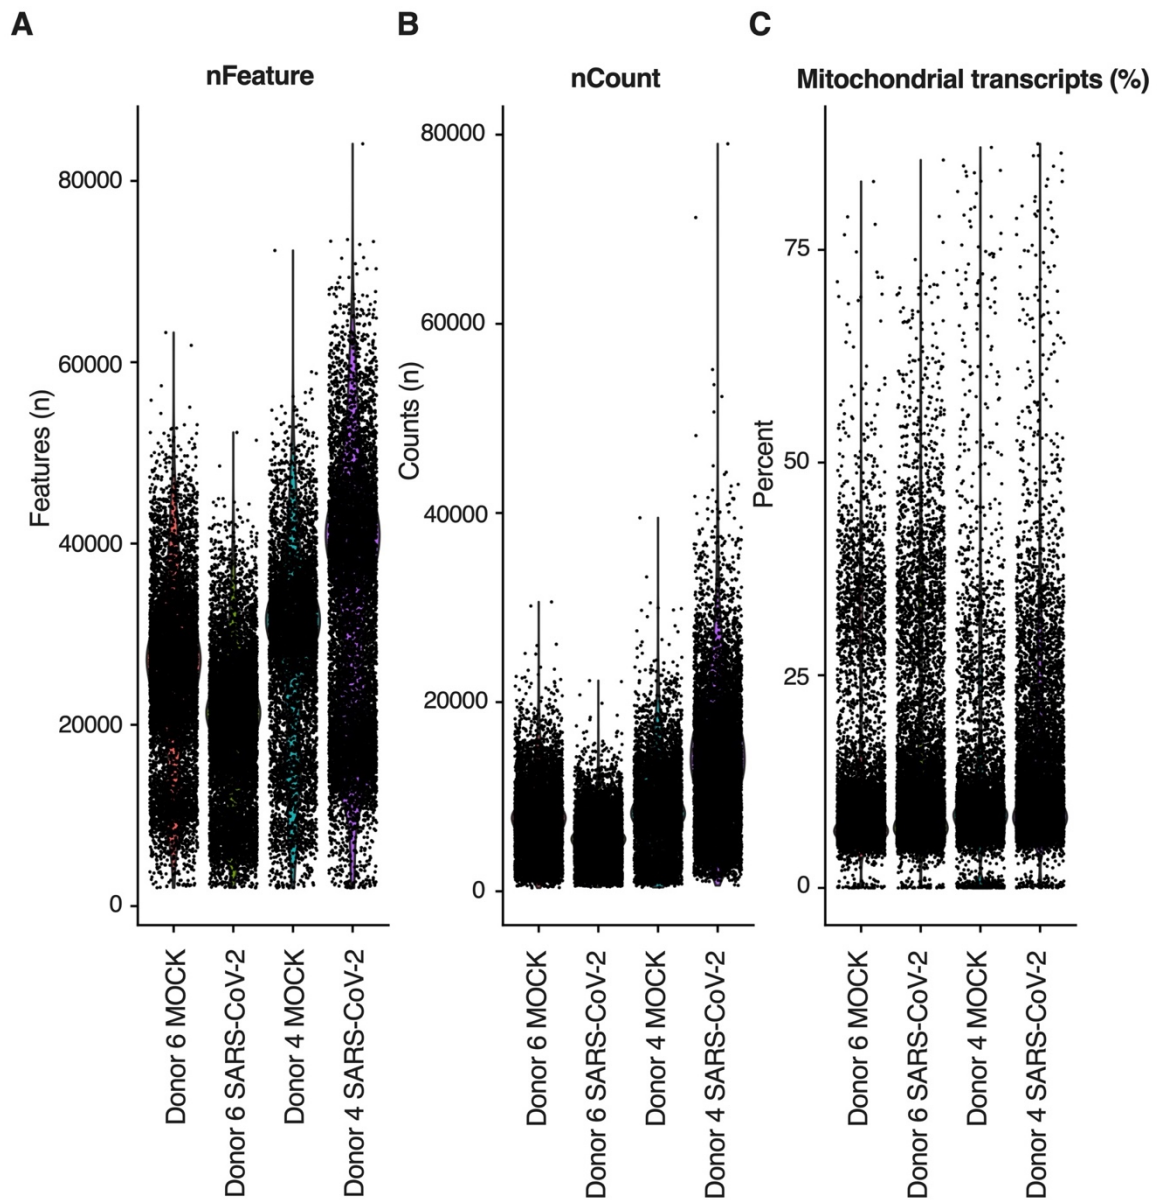

21

22 **Figure S1.** Single cell RNA sequencing quality control plots. Violin plots, split by sample, showing (A)

23 the total number of genes detected in each cell (B) the total number of counts detected in each cell

24 and (C) the proportion (as a percentage) of mitochondrial transcripts in each cell. For individual QC

25 metrics see also Table S1.

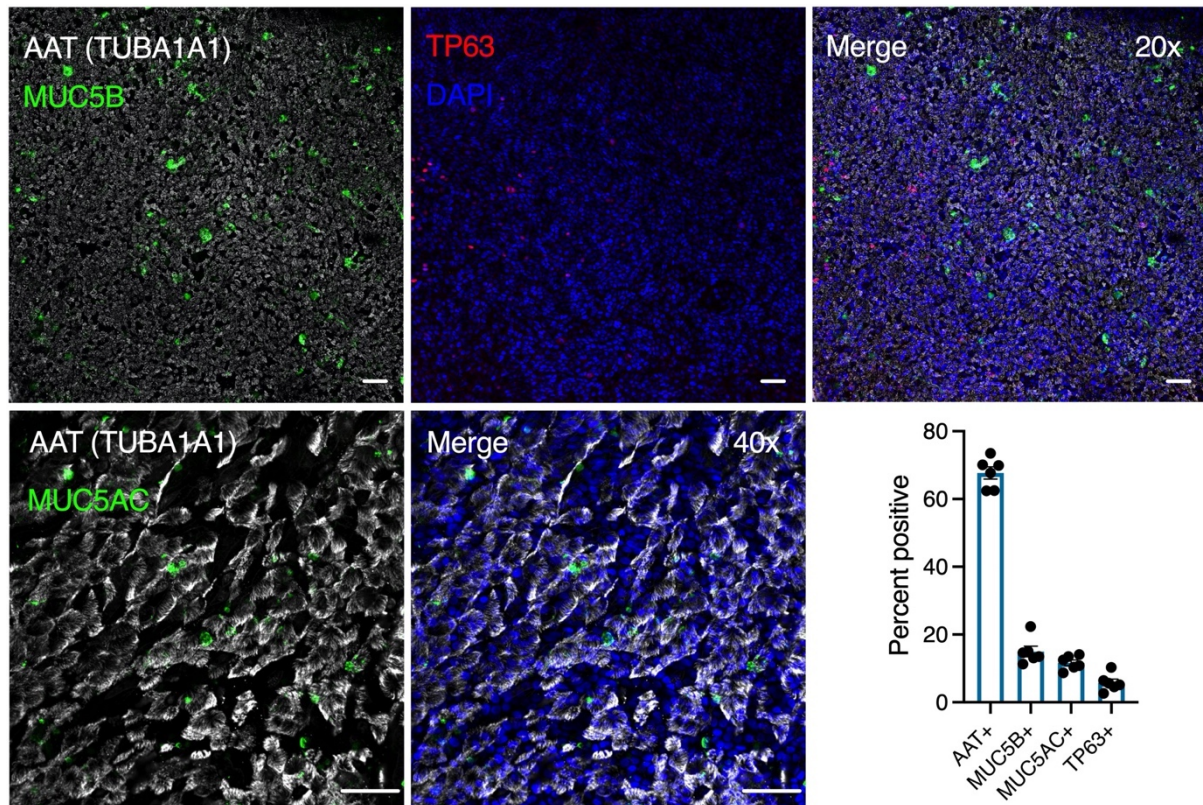

26

27 **Figure S2.** Immunofluorescence analysis of ciliated (AAT+), secretory (MUC5B+), goblet (MUC5AC+) and basal (TP63+) cells in nasal ALI cultures. Representative images from n=6 donors, scale bar = 20  
 28 mm (top panel 20x magnification, bottom panel 40x magnification as indicated). Frequency of cell  
 29 type as a proportion of cells counted is displayed in the bar plot. MUC5B and MUC5AC co-staining  
 30 demonstrated no overlap in immunoreactivity (data not shown).  
 31

32

33

34

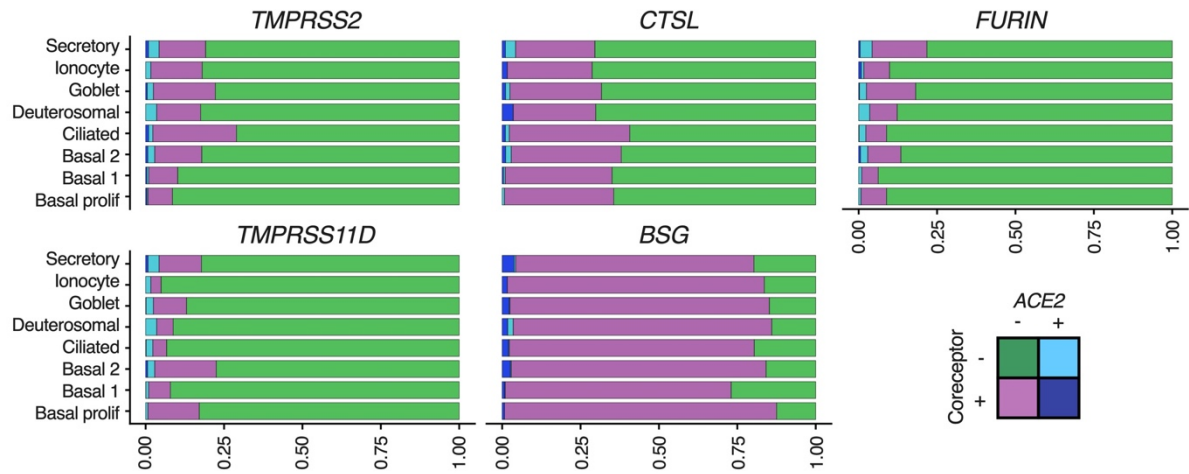

35

36 **Figure S3.** Single-cell RNA-seq analysis of entry receptor expression by cell type. Bars represent the  
 37 proportion of cells expressing each combination of *ACE2* and other transcript, coloured according to  
 38 the key. Dark blue represents the proportion of cells of each type expressing both *ACE2* and the  
 39 relevant additional transcript. Data from analysis of 28,346 cells from n=2 donors.

40

41

42

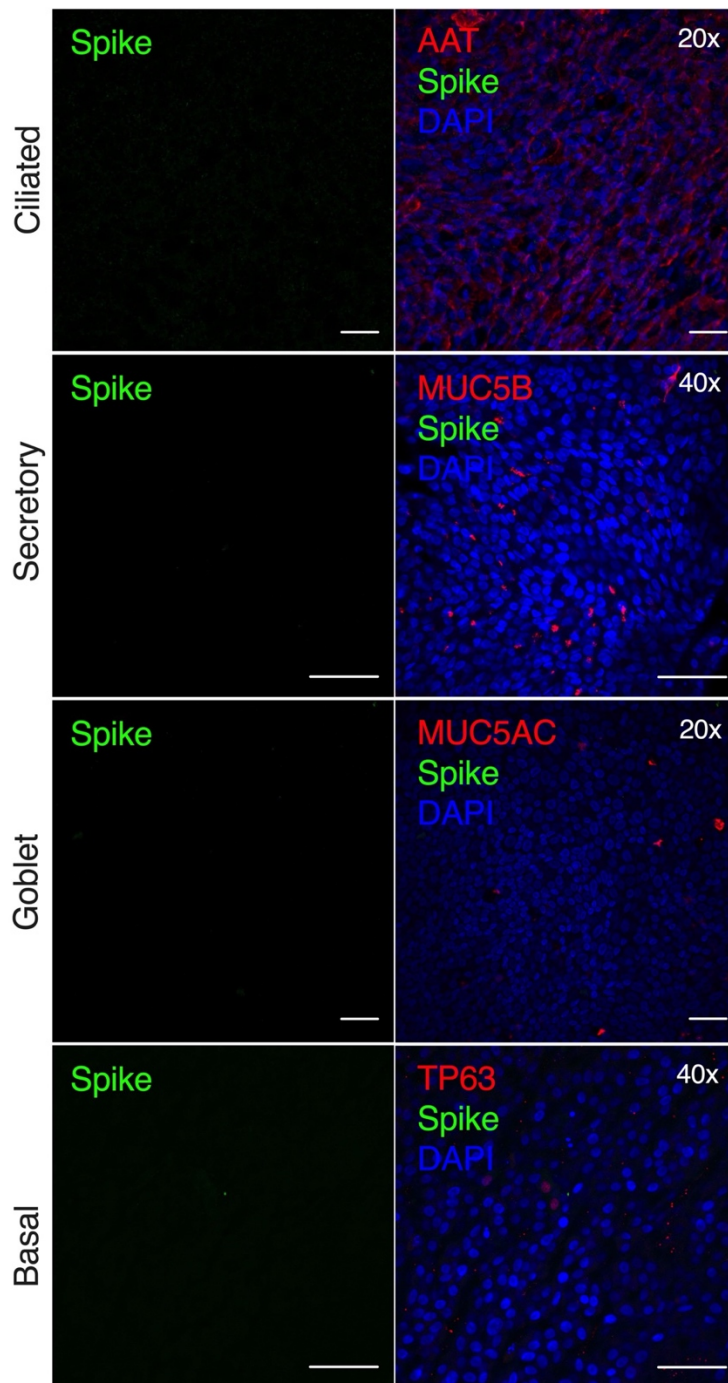

43

44 **Figure S4.** Immunofluorescence analysis of S protein immunoreactivity in mock infected nasal ALI  
 45 cultures. Displayed are mock infected ciliated (AAT+), secretory (MUC5B+), goblet (MUC5AC+) and  
 46 basal (TP63+) cells stained for S protein. Representative images from n=5 donors, scale bar = 20 mm  
 47 (images at 20x or 40x magnification as indicated).

48

49

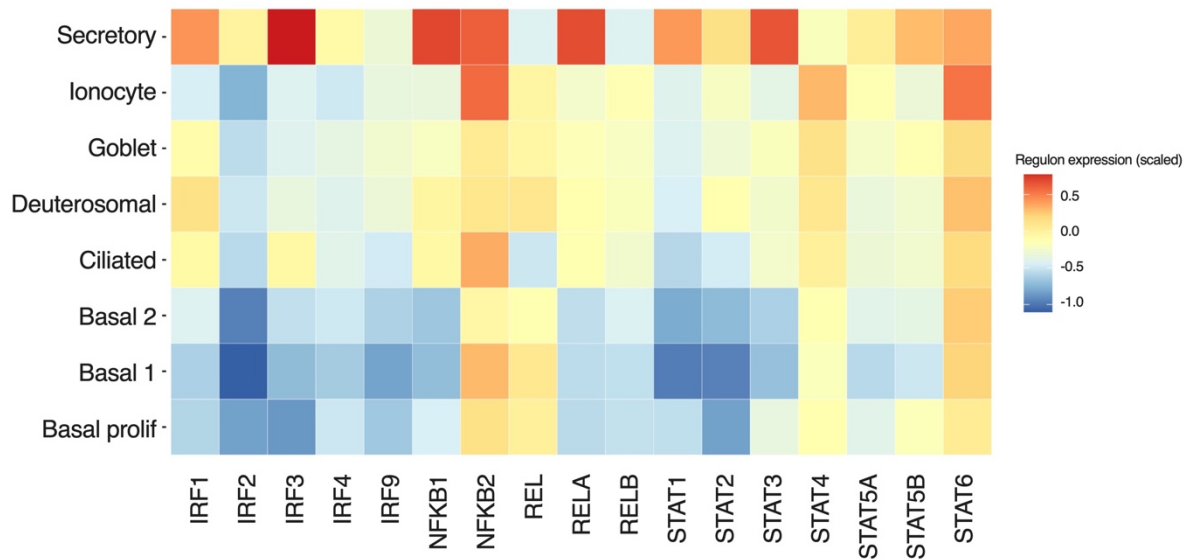

50

51 **Figure S5.** DoRoThea/VIPER analysis of regulon activity in infected cells. Median regulon activity per  
 52 cluster in infected cells, corrected for activity in uninfected cells by subtraction then Z-normalised by  
 53 TF (i.e. values > 0 imply TF more active in infected cells). Data from analysis of 28,346 cells total to  
 54 estimate regulon activity of which 8,861 infected, from n=2 donors at 24 hpi.

55

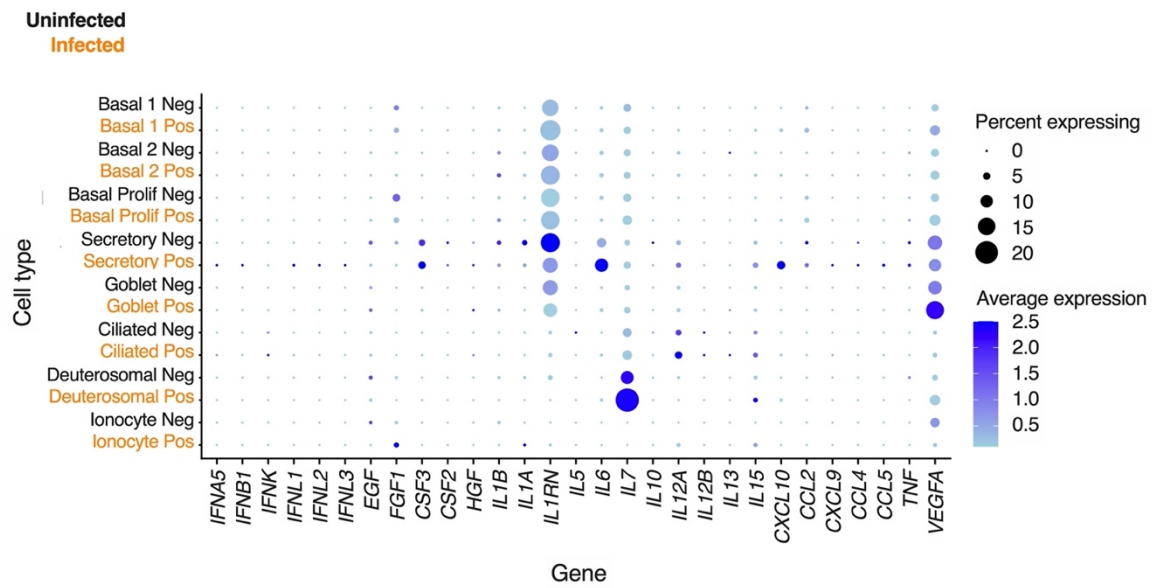

56

57 **Figure S6.** Interferon, chemokine and cytokine induction in response to SARS-CoV-2. Dot plot showing

58 single-cell RNA-seq analysis of cytokine and chemokine transcript detection in n=2 donors at 24 hpi

59 (size of dots represent proportion of cells expressing and colour represents mean expression).

60 Uninfected cells are labelled black (Neg) and infected cells orange (Pos) based on expression of SARS-

61 CoV-2 mRNA. Low-level induction of certain proinflammatory cytokines (*IL6*, *IL12A*, *IL15*), chemokines

62 (*CXCL9*, *CXCL10*) and *VEGFA* is demonstrated in SARS-CoV-2-infected nasal cells.

63

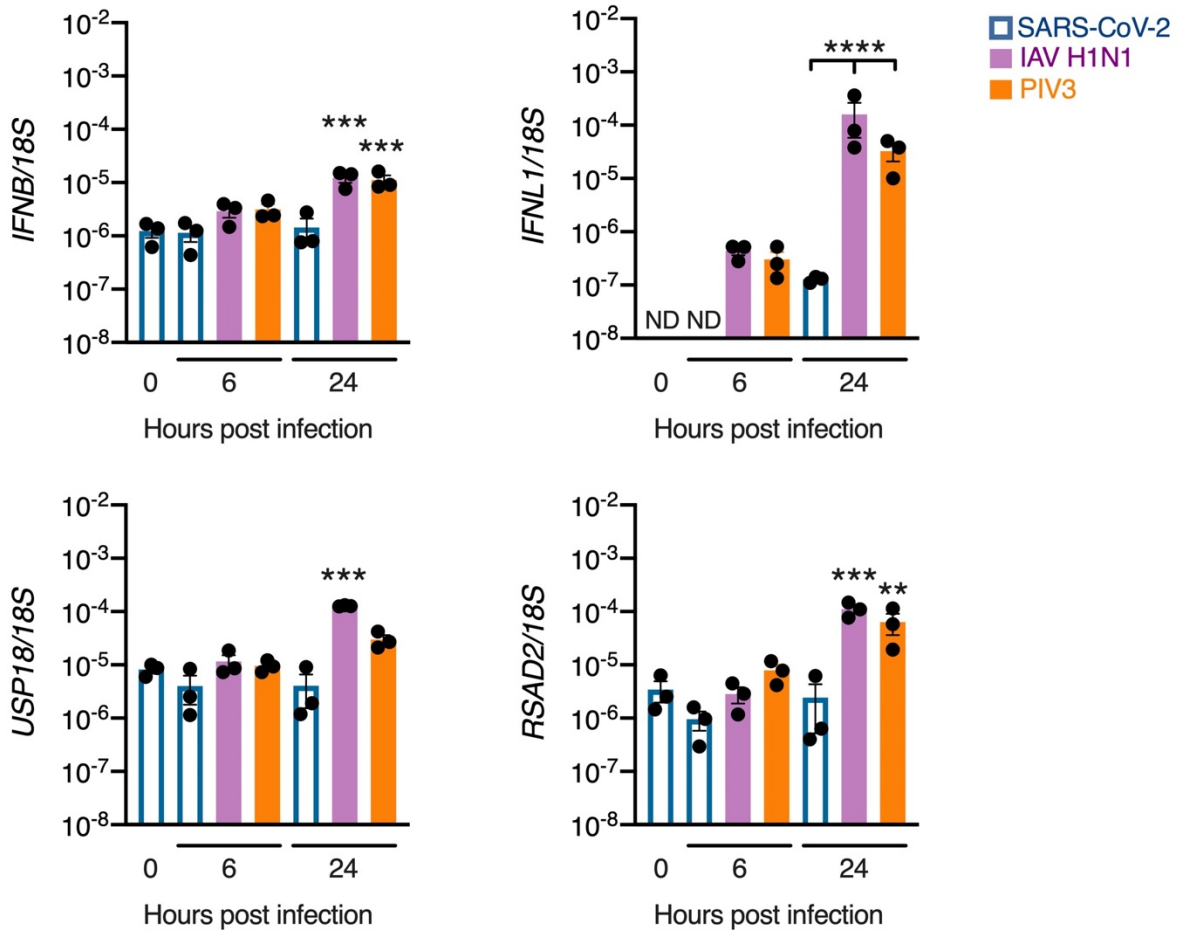

64

65 **Figure S7.** Delayed induction of IFNs and ISGs in response to SARS-CoV-2 compared to other viruses.

66 RT-PCR analysis of *IFNB*, *IFNL1*, *USP18* and *RSAD2* expression in nasal ALLI cultures mock infected (0h)

67 or exposed to SARS-CoV-2 (open bars), influenza A virus (IAV H1N1, purple bars) or parainfluenza 3

68 virus (PIV3, orange bars) for the times displayed, all at MOI 0.1 (n=3 donors, mean ± SEM; ANOVA with

69 Dunnett's post-test correction compared to 0h, or Sidak's post-test correction [all viruses compared

70 at 24 hpi], \*\* P < 0.01 \*\*\* P < 0.01 \*\*\*\* P < 0.001). ND = not detected.

71

72

73



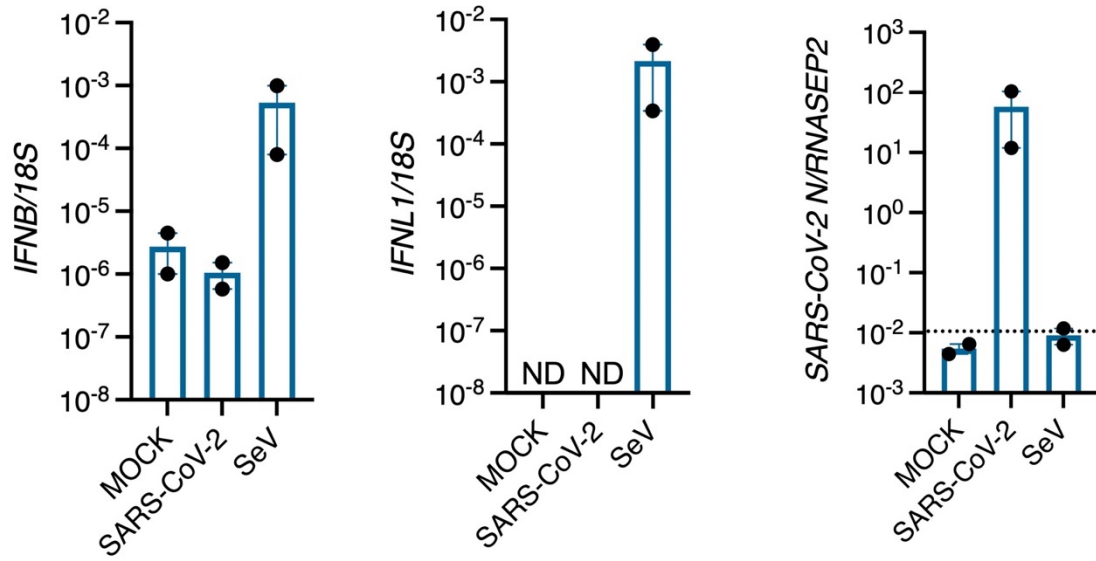

74

75 **Figure S8.** Robust nasal cell expression of *IFNB* and *IFNL1* in response to Sendai virus. RT-PCR analysis  
 76 of *IFNB*, *IFNL1* and SARS-CoV-2 *N* gene expression in nasal ALI cultures exposed to SARS-CoV-2 (MOI  
 77 2) or a DVG-rich stock of Sendai virus (SeV) for 6 h (n=2 donors, mean ± SEM). ND = not detected.

78

79

80

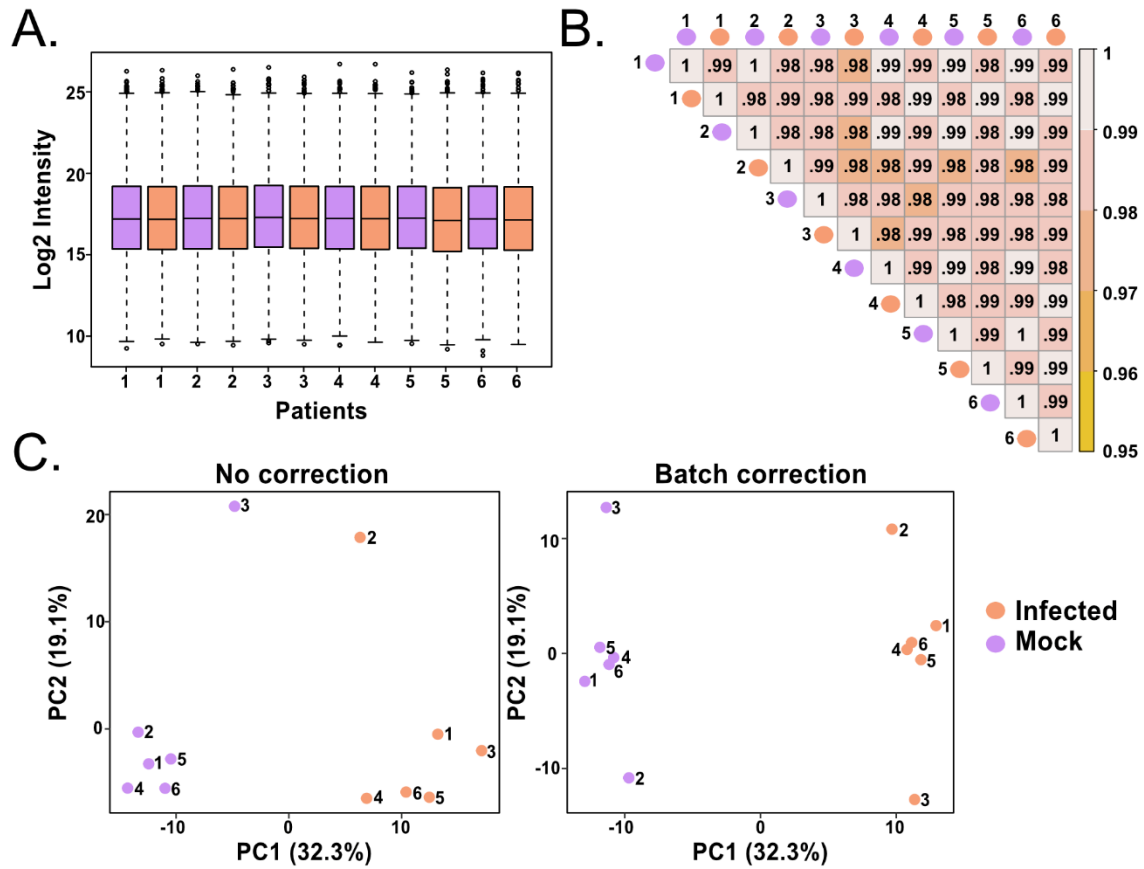

81

82 **Figure S9.** Quality control measures for the proteomics data set. (A) Boxplot of log<sub>2</sub> transformed  
 83 samples shows equal loading. (B) Pearson correlation heatmap among the log<sub>2</sub> transformed samples  
 84 shows high reproducibility between samples. (C) Principal component analysis plots with no correction  
 85 (left) and after removing patient batch effects (right).

86

87

88

89

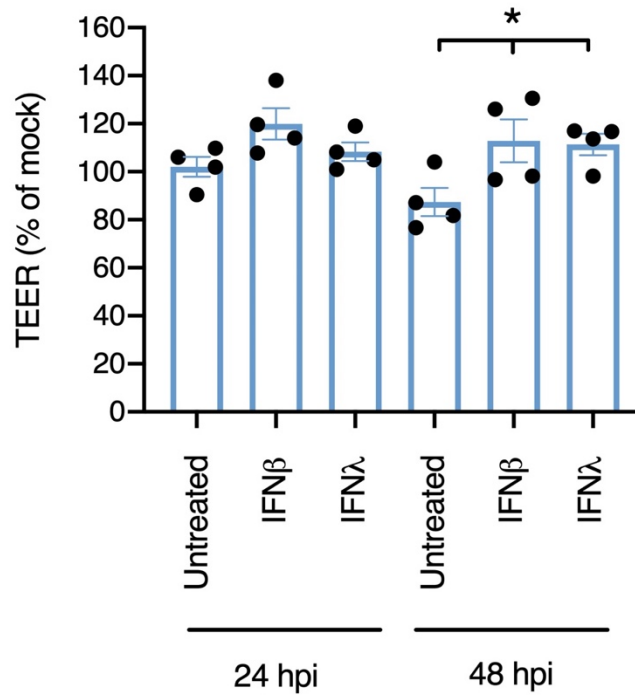

90

91 **Figure S10.** IFN treatment preserves barrier integrity in the face of SARS-CoV-2 infection. Trans-  
 92 epithelial resistance measurement (expressed as % of mock infected controls) at 24 and 48 hpi (MOI  
 93 0.01) were compared to cells pre-treated for 16h with IFNβ1 (1000 IU/mL) or IFNλ1 (100 ng/mL).  
 94 Repeat experiments in n=4 donors, mean ± SEM; \* P < 0.05, ANOVA with Sidak's post-test correction.

95

96

97

98

99

100 **Supplementary Tables**

| Sample_id       | Total number of reads | Mean reads per cell | Alignment rate (%) | Reads mapped to GRCh38 (5) | Reads mapped to SARS-CoV-2 | Estimated number of cells |
|-----------------|-----------------------|---------------------|--------------------|----------------------------|----------------------------|---------------------------|
| Donor4_Mock     | 184,897,338           | 14,329              | 91.3               | 91.3                       | 0                          | 12,904                    |
| Donor4_Infected | 807,865,486           | 61,100              | 87.7               | 77.1                       | 10.8                       | 13,222                    |
| Donor6_Mock     | 232,499,890           | 17,121              | 90.4               | 90.4                       | 0                          | 13,580                    |
| Donor6_Infected | 174,974,839           | 13,653              | 90                 | 88.8                       | 1.3                        | 12,816                    |

101

102 **Table S1.** Single cell RNA-seq post-alignment quality control metrics. Quality control output from

103 CellRanger following alignment.

104

105

| GO_TERM                                               | FDR Adjusted P value |
|-------------------------------------------------------|----------------------|
| Defence response to virus                             | 4.5E-28              |
| Type I interferon signalling pathway                  | 2.3E-18              |
| Response to virus                                     | 1.4E-13              |
| Negative regulation of viral genome regulation        | 5.7E-11              |
| Interferon gamma-mediated signalling pathway          | 5.8E-9               |
| Innate immune response                                | 7.6E-5               |
| Intracellular transport of viral protein in host cell | 6.9E-3               |
| Negative regulation of type I interferon production   | 7.2E-3               |
| Antigen processing and presentation via MHC class I   | 1.1E-2               |
| Cellular response to interferon alpha                 | 1.7E-2               |
| Response to interferon alpha                          | 2.0E-2               |

106

107 **Table S2.** Pathway analysis of proteomics data showing upregulated pathways. Displayed are

108 pathways with Benjamini-Hochberg false-discovery rate (FDR)-adjusted P value &lt; 0.05 (5E-2).

109

110

| GO_TERM                                                                            | FDR Adjusted P value |
|------------------------------------------------------------------------------------|----------------------|
| TRIF-dependent toll-like receptor signalling pathway                               | 1.5E-2               |
| Regulation of transcription from RNA polymerase II promoter in response to hypoxia | 1.5E-2               |
| Endosomal transport                                                                | 1.7E-2               |
| MyD88-independent toll-like receptor signalling pathway                            | 1.7E-2               |
| Transcription-coupled nucleotide-excision repair                                   | 2.4E-2               |

111

112 **Table S3.** Gene Ontology (GO) Term analysis of proteomics data showing downregulated pathways.

113 Displayed are pathways with Benjamini-Hochberg false-discovery rate (FDR)-adjusted P value < 0.05

114 (5E-2).

115

116

117

118

| Donor no. | Sex    | Age (years) |
|-----------|--------|-------------|
| 1         | Female | 46          |
| 2         | Female | 38          |
| 3         | Male   | 68          |
| 4         | Male   | 78          |
| 5         | Female | 54          |
| 6         | Male   | 41          |

119

120 **Table S4.** Nasal cell donors.

121

122

| Gene         | UPL probe | Forward sequence         | Reverse sequence        |
|--------------|-----------|--------------------------|-------------------------|
| <i>IFNB</i>  | #25       | CGACACTGTTTCGTGTTGTCA    | GAAGCACAACAGGAGAGCAA    |
| <i>IFNL1</i> | #75       | GGGACCTGAGGCTTCTCC       | CCAGGACCTTCAGCGTCA      |
| <i>IL6</i>   | #40       | GATGAGTACAAAAGTCCTGATCCA | CTGCAGCCACTGGTTCTGT     |
| <i>IL1B</i>  | #78       | TACCTGTCCTGCGTGTTGAA     | TCTTTGGGTAATTTTTGGGATCT |
| <i>RSAD2</i> | #9        | GAGGGTGAGAATTGTGGAGAAG   | GCGCTCCAAGAATCTTTCAA    |
| <i>USP18</i> | #44       | CAACGTGCCCTTGTTTGTC      | ATCAGGTTCCAGAGTTTGAGGT  |
| <i>ISG15</i> | #23       | GCGAACTCATCTTTGCCAGTA    | CCAGCATCTTCACCGTCAG     |
| <i>18S</i>   | #81       | CCGATTGGATGGTTTAGTGAG    | AGTTCGACCGTCTTCTCAGC    |

123

124 **Table S5.** Primers/probes. UPL = Roche universal probe library.

125



| Antibody                     | Host   | Dilution          | Source | Code        |
|------------------------------|--------|-------------------|--------|-------------|
| Spike                        | Rabbit | 1:1000            | Novus  | nb100-56578 |
| RSAD2                        | Rabbit | 1:1000            | CST    | 13996       |
| ISG15                        | Rabbit | 1:1000            | CST    | 2743        |
| USP18                        | Mouse  | 1:2000            | SCB    | sc-1668     |
| ACE2                         | Rabbit | 1:1000            | Abcam  | ab15348     |
| ACE2                         | Goat   | 1:200             | R&D    | AF933       |
| TMPRSS2                      | Rabbit | 1:1000            | Abcam  | ab92323     |
| MxA                          | Rabbit | 1:1000            | SCB    | sc-50509    |
| GAPDH                        | Rabbit | 1:10,000          | CST    | 5174        |
| MUC5B                        | Rabbit | 1:1000            | Sigma  | HPA008246   |
| MUC5AC                       | Rabbit | 1:1000            | Sigma  | HPA040615   |
| TP63                         | Mouse  | 1:2000            | Abcam  | ab735       |
| Acetylated-alpha tubulin     | Mouse  | 1:1000            | Abcam  | ab24610     |
| Anti-rabbit HRP- conjugated  | Goat   | Primary-dependent | CST    | 7074        |
| Anti-mouse HRP-conjugated    | Horse  | Primary-dependent | CST    | 7076        |
| AF488 conjugated anti-mouse  | Goat   | 1:2000            | TFS    | A-11001     |
| AF488 conjugated anti-rabbit | Goat   | 1:2000            | TFS    | A-11008     |
| AF594 conjugated anti-mouse  | Goat   | 1:2000            | TFS    | A-11005     |
| AF594 conjugated anti-rabbit | Goat   | 1:2000            | TFS    | A-11012     |

126

127 **Table S6.** Antibodies. CST = Cell Signalling; SCB = Santa Cruz Biotechnology; R&D = R&D biosystems;

128 TFS = ThermoFisher Scientific. HRP = horseradish peroxidase.

129

130

131

132 **Supplementary Methods**

133

134 **Proteome sample preparation**

135 Cells were washed three times with cold PBS before addition of solubilisation buffer (5% (w/v) SDS, 50  
136 mM TEAB) to the apical compartment for 10 min at room temperature (RT). Samples were heated at  
137 75°C for 45 min, before freezing and stored at -80°C. Protein concentration was determined by EZQ®  
138 protein quantification assay. A total of 30 µg protein was reduced by incubation with 5 mM tris(2-  
139 carboxyethyl)phosphine for 15 min at 37°C, and subsequently alkylated with 20 mM iodoacetamide  
140 for 30 min at RT in the dark. Protein digestion was performed using the suspension trapping (S-Trap™)  
141 sample preparation method according to the manufacturer's guidelines (ProtiFi, USA). Briefly, 2.5 µL  
142 of 12% phosphoric acid was added to each sample, followed by the addition of 165 µL S-Trap binding  
143 buffer (100 mM TEAB in 90% methanol, pH 7.1). Samples were added to S-Trap Micro spin columns  
144 followed by centrifugation (4,000 g, 2 min). Each S-Trap Mini-spin column was washed with 150 µL S-  
145 trap binding buffer by centrifugation (4,000 g, 1 min). This process was repeated for a total of 4  
146 washes. 25 µL of 50 mM TEAB, pH 8.0 containing trypsin (1:20 ratio of trypsin to protein) was added  
147 to each sample, followed by proteolytic digestion for 3 hours at 47°C without shaking. Peptides were  
148 eluted with 50 mM TEAB pH 8.0 and centrifugation (4,000 g, 2 min). Elution steps were repeated twice  
149 more, using 0.2% formic acid and 0.2% formic acid in 50% acetonitrile, respectively. The three eluates  
150 from each sample were combined and dried using a speed-vac before storage at -80°C.

151

152 **TMT-16 plex labelling**

153 Each 30 µg protein digest was resuspended in 25 µL 100 mM HEPES, pH 8.5. TMT-16 plex labelling  
154 (TMT lot number: UI292951) was carried out as per the manufacturer's instructions. Samples were  
155 assigned to a TMT tag. 10 µL of the corresponding TMT tag was added per sample and incubated for  
156 1 hour at RT. An aliquot corresponding to 1 µg was taken from each sample and pooled together for  
157 ratio and labelling efficiency checks, prior to making the full pooled sample. The test pool was

158 quenched with 0.69  $\mu\text{L}$  of 5% hydroxylamine, incubated for 15 min at room temperature, and dried  
159 using a speed-vac. The sample was cleaned using a C18 spin column as per the manufacturer's  
160 guidelines (Thermo Scientific), and subsequently dried using a speed-vac. Peptides (dissolved in 5%  
161 formic acid) from the pooled sample were analysed for labelling efficiency and ratio check. For the  
162 ratio check, each sample (corresponding to a single TMT channel) was normalised to the average  
163 summed intensity of all samples within its pool. Each sample was quenched with 2.5  $\mu\text{L}$  5%  
164 hydroxylamine and incubated for 15 min. Subsequently, samples were pooled together based on the  
165 scaling factors, which were calculated using the test pool. Samples were dried using a speed-vac,  
166 cleaned using MacroSpin columns as per the manufacturer's guidelines (Harvard Apparatus, USA), and  
167 dried down again using a speed-vac prior to offline high-performance liquid chromatography (HPLC)  
168 fractionation.

169

#### 170 **Offline HPLC Fractionation**

171 Peptides were resuspended in 80  $\mu\text{L}$  ammonium formate, pH 8.0. Peptides were fractionated on a  
172 Basic Reverse Phase column (Gemini C18, 3  $\mu\text{m}$  particle size, 110A pore, 3 mm internal diameter, 250  
173 mm length, Phenomenex #00G-4439-Y0) on a Dionex Ultimate 3000 off-line LC system. All solvents  
174 used were HPLC grade (Rathburn Chemicals, UK). 40  $\mu\text{L}$  of peptide sample were loaded onto the  
175 column for 1 min at 250  $\mu\text{L}/\text{min}$  using 99% Buffer A (20 mM ammonium formate, pH 8.0) and eluted  
176 for 40 min on a linear gradient from 1 to 90% Buffer B (100% acetonitrile (ACN)). Peptide elution was  
177 monitored by UV detection at 214 nm. Fractions were collected every minute from 2 to 38 minutes  
178 for a total of 36 fractions. Fractions were pooled using non-consecutive concatenation to obtain 18  
179 pooled fractions (e.g. pooled fraction 1: fraction 1 + 19). Each fraction was acidified to a final  
180 concentration of 1% TFA and dried using a speed-vac.

181

#### 182 **Mass spectrometry**

183 Peptides were dissolved in 5% formic acid, and each sample was independently analysed on an  
184 Orbitrap Fusion Lumos Tribrid mass spectrometer (Thermo Fisher Scientific), connected to an UltiMate  
185 3000 RSLCnano System (Thermo Fisher Scientific). Peptides (~2 µg per fraction) were injected on an  
186 Acclaim PepMap 100 C18 LC trap column (100 µm ID × 20 mm, 3 µm, 100 Å) followed by separation  
187 on an EASY-Spray nanoLC C18 column (75 ID µm × 750 mm, 2 µm, 100 Å) at a flow rate of 200 nL/min.  
188 Solvent A was 0.1% formic acid in H<sub>2</sub>O and solvent B was 80% ACN containing 0.1% formic acid. The  
189 gradient used for analysis of proteome samples was as follows: solvent B was maintained at 3% for  
190 5 min, followed by an increase of solvent B from 3% to 35% in 120 min, 35% to 90% B in 0.5 min,  
191 maintained at 90% B for 4 min, followed by a decrease to 3% in 0.5 min and equilibration at 3% for  
192 20 min. Mass spectrometric identification and quantification was performed on an Orbitrap Fusion  
193 Tribrid mass spectrometer (Thermo-Fisher Scientific) operated in data-dependent, positive ion mode.  
194 Full scan spectra were acquired in a range from 375 m/z to 1500 m/z, at a resolution of 120,000, with  
195 a standard automated gain control (AGC) (Tune 3.3) and a maximum injection time of 50 ms. Precursor  
196 ions were isolated with a quadrupole mass filter width of 0.7 m/z and CID fragmentation was  
197 performed in one-step collision energy of 30% and 0.25 activation Q. Detection of MS/MS fragments  
198 was acquired in the linear ion trap in a rapid mode using a Top 3s method, with a standard AGC target  
199 and a maximum injection time of 50 ms. The dynamic exclusion of previously acquired precursor was  
200 enabled for 60 s with a tolerance of +/-10 ppm. Quantitative analysis of TMT-tagged peptides was  
201 performed using FTMS3 acquisition in the Orbitrap mass analyser operated at 60,000 resolution, with  
202 a standard AGC target and maximum injection time of 118 ms. HCD fragmentation on MS/MS  
203 fragments was performed in one-step collision energy of 55% to ensure maximal TMT reporter ion  
204 yield and synchronous-precursor-selection (SPS) was enabled to include 10 MS/MS fragment ions in  
205 the FTMS3 scan.

206

207 **Mass spectrometry data analysis**

208 All spectra were analysed using MaxQuant 1.6.10.43 and searched against SwissProt *Homo*  
209 *sapiens* (with 42423 sequences) and Trembl SARS-CoV-2 (with 107 sequences) FASTA files. Peak list  
210 generation was performed within MaxQuant and searches were performed using default parameters  
211 and the built-in Andromeda search engine. Reporter ion MS3 was used for quantification and the  
212 additional parameter of quantitation labels with 16 plex TMT on N-terminus or lysine was included.  
213 The enzyme specificity was set to consider fully tryptic peptides, and two missed cleavages were  
214 allowed. Oxidation of methionine and N-terminal acetylation were allowed as variable modifications.  
215 Carbamidomethylation of cysteine was allowed as a fixed modification. A protein and peptide false  
216 discovery rate (FDR) of less than 1% was employed in MaxQuant. Reporter ion intensities were used  
217 for data analysis. Briefly, the data were filtered to remove proteins that matched to a contaminant or  
218 a reverse database, which were only identified by site, which were not quantified in every sample, or  
219 which contained less than 2 unique peptides. Reporter ion intensity values were  $\log_2$  transformed.  
220 Each sample within a TMT set was then normalised to the average median intensity of all 12 samples  
221 within that set. Moderated *t*-tests, with patient accounted for in the linear model, was performed  
222 using Limma, where proteins with an adjusted  $P < 0.05$  were considered as statistically significant.  
223 Proteins with differential abundance (adjusted p-value  $< 0.05$  and fold change  $> 1.5$ ) were analysed  
224 using the search tool for retrieval of interacting genes (STRING) database version 11 ([https://string-  
226 db.org/](https://string-<br/>225 db.org/)). The data was modified for presentation using Cytoscape version 3.7.2. Proteins were  
227 grouped by functional categories based Uniprot annotation (<https://www.uniprot.org>). Active  
228 interaction sources, including experiments and databases, and an interaction score  $> 0.7$  were applied  
229 to construct the protein-protein interaction networks. In the network, the nodes correspond to the  
230 proteins identified and the edges represent the interactions. The node colour gradient depicts fold  
231 change in protein expression in infected compared to mock samples. All analysis was performed using  
232 R 3.6.2.  
233
